# Supplementary material for: Behavioral and Sociodemographic determinants of poor self-rated health among U.S. adults: an interpretable machine learning analysis
Source: Research Square preprint supplement (doi:10.21203/rs.3.rs-8295005/v1), 2026-02-16
Supplement: Supplementary file 1 [file f35adb4b07bee6c4a137bd6d.docx]

Supplementary Material

**Behavioral and Sociodemographic Determinants of Poor Self-Rated Health Among U.S. Adults: An Interpretable Machine Learning Analysis**

**Table S1.** Detailed Information About Selected Variables from the Behavioral Risk Factor Surveillance System, 2023

| **Feature** | **Description** | **Values** |
| --- | --- | --- |
| _LLCPWT | Final weight assigned to each respondent: Land-line and cell-phone data (Raking derived weight) |  |
| GENHLTH | Would you say that in general your health is: | 1: Excellent, 2: Very good, 3: Good,  4: Fair, 5: Poor |
| SEXVAR | Indicate sex of respondent | 1: Male, 2: Female |
| _AGEG5YR | Fourteen-level age category | 1: 18–24, increasing in 5-year intervals up to 13: >80, 14: Don’t know/Refused/Missing |
| MARITAL | Are you . . . (marital status) | 1: Married, 2: Divorced, 3: Widowed,  4: Separated, 5: Never married, 6: Unmarried couple |
| _IMPRACE | Imputed race/ethnicity value | 1: White, 2: Black, 3: Asian, 4: American Indian or Alaskan Native,  5: Hispanic, 6: Other race |
| EDUCA | Level of education completed | 1: Never attended, 2: Elementary,  3: Some high school, 4: High school graduate, 5: Some college, 6: College graduate |
| EMPLOY1 | Are you currently…? | 1: Employed, 2: Self-employed, 3: No work >1 y, 4: No work <1 y,  5: Homemaker, 6: Student, 7: Retired, 8: Unable to work |
| INCOME3 | What is your annual household income from all sources? | 1: <$10 K, 2: $10–$15 K, 3: $15–$20 K, 4: $20–$25 K, 5:  $25–$35 K, 6: $35–$50 K, 7: $50–$75 K, 8: $75 K-$100k, 9: $100k-$150k,  10: $150k-$200k, 11: >$200k |
| _RFSMOK3 | Adults who are current smokers | 1: No, 2: Yes |
| _RFDRHV8 | Heavy drinkers (adult men having more than 14 drinks per week and adult women having more than 7 drinks per week) | 1: No, 2: Yes |
| EXERANY2 | Engagement in physical exercise during past month (excluding work-related activity) | 1: Yes, 2: No |
| _BMI5CAT | Four-categories of Body Mass Index (BMI) | 1: Underweight, 2: Normal weight,  3: Overweight, 4: Obese |
| DIABETE4 | Have you ever been told you have diabetes? | 1: Yes, 2: Yes, but during pregnancy,  3: No, 4: Prediabetes or borderline |
| CVDINFR4 | Have you ever been told you had a heart attack, also called a myocardial infarction? | 1: Yes, 2: No |
| CVDSTRK3 | Have you ever been told you had a stroke | 1: Yes, 2: No |
| CHCOCNC1 | Have you ever been told you had melanoma or any other types of cancer? | 1: Yes, 2: No |
| MENTHLTH | Number of days in the past 30 days when mental health was reported as not good (including stress, depression, and emotional problems) | 1-30: Number of days, 88: None |
| ADDEPEV3 | Have you ever been told you had a depressive disorder (including depression, major depression, dysthymia, or minor depression)? | 1: Yes, 2: No |
| _HLTHPL1 | Adults who had some form of health insurance | 1: Have some form of insurance,  2: Do not have |
| PERSDOC3 | Do you have one person (or a group of doctors) that you think of as your personal health care provider? | 1: Yes, only one, 2: Yes, more than one, 3: No |
| CHECKUP1 | About how long has it been since you last visited a doctor for a routine checkup? | 1: <1 y, 2: <2 y, 3: <5 y, 4: >5 y, 8: Never |

# **Table S2.** Summary statistics of the final dataset after preprocessing (n = 302,125)

| **Variable** | **Count (n)** | **Proportion (%)** |
| --- | --- | --- |
| **General health (Target variable)** | | |
| Poor | 53,945 | 17.86 |
| Good | 248,180 | 82.14 |
| **Sex** | | |
| Male | 144,485 | 47.82 |
| Female | 157,640 | 52.18 |
| **Age (year)** | | |
| 18-29 | 29,608 | 9.79 |
| 30-39 | 39,136 | 12.95 |
| 40-49 | 42,486 | 14.06 |
| 50-59 | 49,679 | 16.44 |
| 60-69 | 64,257 | 21.26 |
| 70-79 | 53,911 | 17.84 |
| >80 | 23,048 | 7.62 |
| **Race/Ethnicity** | | |
| White | 228,542 | 75.64 |
| Black | 22,139 | 7.32 |
| Asian | 7,981 | 2.64 |
| American Indian/Alaskan Native | 4,660 | 1.54 |
| Hispanic | 27,977 | 9.26 |
| Other race | 10,826 | 3.58 |
| **Education level** | | |
| Grade 1 through 11 | 14,014 | 4.63 |
| Grade 12 or GED (High school graduate) | 68,862 | 22.79 |
| College 1-3 years | 80,836 | 26.75 |
| College 4+ years (College graduate) | 138,413 | 45.81 |
| **Annual household income (USD)** | | |
| <10,000 | 7,213 | 2.38 |
| 10,000 to < 15,000 | 7,894 | 2.61 |
| 15,000 to < 20,000 | 10,398 | 3.44 |
| 20,000 to < 25,000 | 14,936 | 4.94 |
| 25,000 to < 35,000 | 32,084 | 10.61 |
| 35,000 to < 50,000 | 40,700 | 13.47 |
| 50,000 to < 75,000 | 51,018 | 16.88 |
| 75,000 to < 100,000 | 43,995 | 14.56 |
| 100,000 to < 150,000 | 47,355 | 15.67 |
| 150,000 to < 200,000 | 22,133 | 7.32 |
| >200,000 | 24,399 | 8.07 |
| **Employment** | | |
| Employed | 163,838 | 54.22 |
| Unemployed/Retired/homemaker/student | 138,287 | 45.77 |
| **Marital Status** | | |
| Married | 162,634 | 53.83 |
| Divorced, Widowed, Separated | 75,182 | 24.88 |
| Never Married, Member of an unmarried couple | 64,309 | 21.28 |
| **Body mass index** | | |
| Underweight | 4,296 | 1.42 |
| Normal weight | 82,261 | 27.22 |
| Overweight | 115,797 | 38.32 |
| Obese | 99,771 | 33.02 |
| **Exercise** | | |
| Yes | 232,640 | 77.01 |
| No | 69,485 | 23.00 |
| **Smoker** | | |
| Yes | 33,200 | 10.98 |
| No | 268,925 | 89.01 |
| **Heavy drinkers** | | |
| Yes | 19,439 | 6.43 |
| No | 282,686 | 93.56 |
| **Diabetes** | | |
| Yes | 41,668 | 13.79 |
| Pre-diabetes | 7,275 | 2.40 |
| No | 253,182 | 83.80 |
| **Heart attack** | | |
| Yes | 16,017 | 5.30 |
| No | 286,108 | 94.69 |
| **Stroke** | | |
| Yes | 12,240 | 4.05 |
| No | 289,885 | 95.94 |
| **Melanoma or any other types of cancer** | | |
| Yes | 35,858 | 11.86 |
| No | 266,267 | 88.13 |
| **Depression** | | |
| Yes | 64,561 | 21.36 |
| No | 237,564 | 78.63 |
| **Number of days mental health not good** | | |
| 15–30 | 39,016 | 12.91 |
| 8–14 | 16,088 | 5.32 |
| 1–7 | 68,651 | 22.72 |
| 0 | 178370 | 59.04 |
| **Health Insurance** | | |
| Yes | 287,550 | 95.17 |
| No | 14,575 | 4.82 |
| **Personal healthcare provider** | | |
| Yes | 268,203 | 88.77 |
| No | 33,922 | 11.22 |
| **How long since last routine checkup** | | |
| Regular (<1 year) | 246,082 | 81.45 |
| Irregular (>1 year or never) | 56,043 | 18.54 |

# **Table S3.** Correlation matrix.Spearman correlation matrix of ordinal predictors, with correlation coefficients annotated. No pairs exceeded the predefined threshold for high collinearity (|ρ| ≥ 0.8).


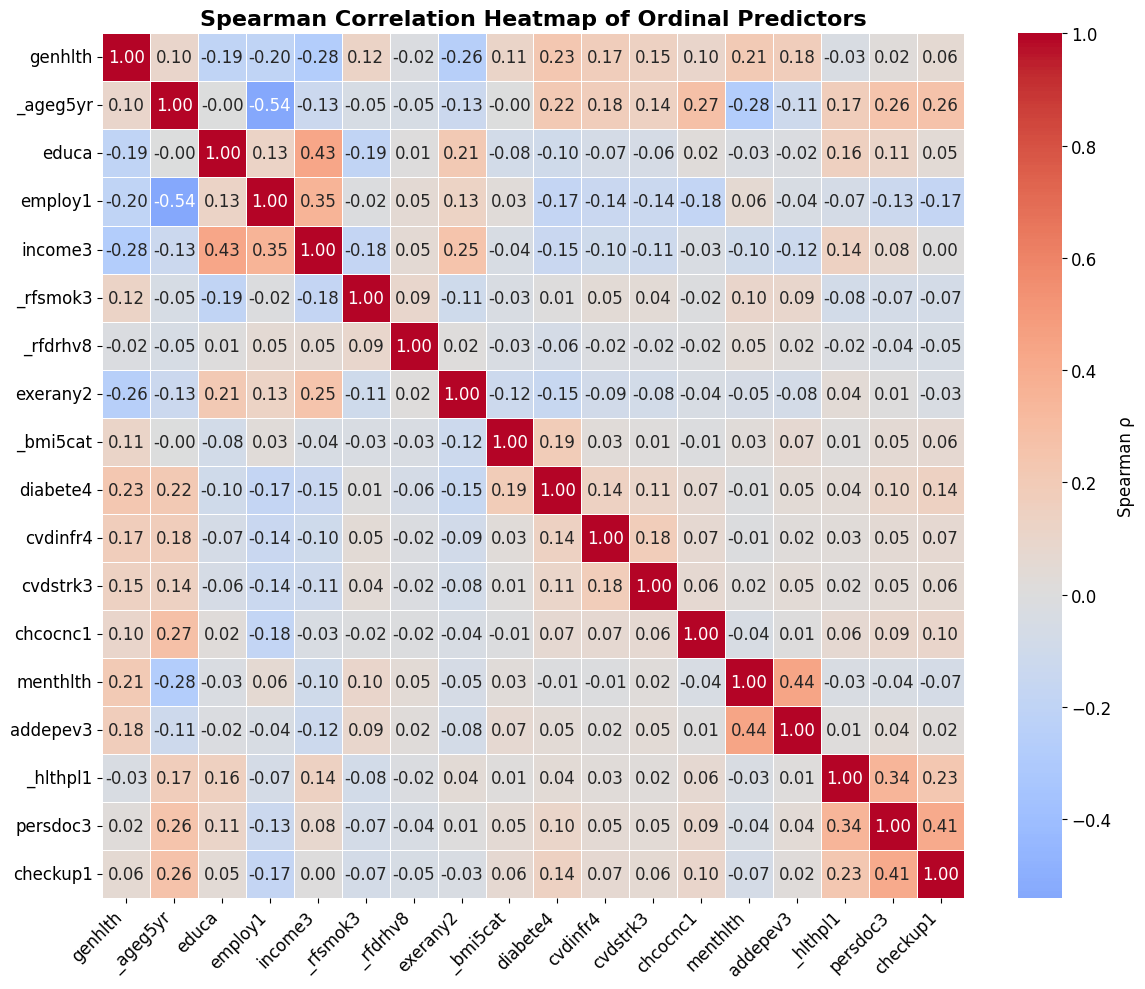


# **Table S4.** Cramér’s V of nominal features. No pairs exceeded the predefined threshold for high collinearity (V >= 0.5).

| **Variable Pair** | **Cramér's V** |
| --- | --- |
| _imprace vs marital | 0.139044 |
| _imprace vs sexvar | 0.043850 |
| marital vs sexvar | 0.124935 |

# **Table S5**

Model Specifications. All models were implemented in Python (version 3.12.11).

| **Model** | **Implementation** | **Key Hyperparameters** | **Class Imbalance Handling** | **Notes** |
| --- | --- | --- | --- | --- |
| Logistic Regression (LR) | sklearn.linear_model.LogisticRegression | max_iter = 2000;  solver = 'lbfgs';  class_weight = 'balanced';  n_jobs = -1 | class_weight = 'balanced' | Chosen for interpretability; regular logistic regression with balanced weighting. |
| Random Forest (RF) | sklearn.ensemble.RandomForestClassifier | n_estimators = 200;  max_depth = 20;  min_samples_split = 2;  min_samples_leaf = 2;  class_weight = 'balanced';  random_state = 42;  n_jobs = -1 | class_weight = 'balanced' | Depth limited to prevent overfitting; balanced weighting addresses class imbalance. |
| Extreme Gradient Boosting (XGB) | xgboost.XGBClassifier | n_estimators = 200;  learning_rate = 0.1;  max_depth = 5;  subsample = 0.8;  colsample_bytree = 0.8;  reg_lambda = 1;  reg_alpha = 0;  scale_pos_weight = (neg/pos);  eval_metric='logloss';  random_state = 42;  verbosity = 0 | scale_pos_weight ratio computed from training data | Moderate tree depth to balance bias–variance; tuned for stability. |
| Light Gradient Boosting Machine (LGBM) | lightgbm.LGBMClassifier | n_estimators = 200;  learning_rate = 0.1;  max_depth = -1;  num_leaves = 31;  subsample = 0.8;  colsample_bytree = 0.8;  reg_lambda = 1.0;  reg_alpha = 0.0;  scale_pos_weight = (neg/pos);  random_state = 42;  n_jobs = -1;  verbose = -1 | scale_pos_weight ratio computed from training data | Used LightGBM for its efficiency with large datasets and support for imbalance handling. |

**Additional Details:**

- Feature Encoding: Categorical variables (_imprace, marital, sexvar) were one-hot encoded using pd.get_dummies() with drop_first=True.
- Train-Test Split: Data split in an 80:20 ratio (random_state=42), ensuring no data leakage.
- Evaluation Metrics: Sensitivity, Specificity, Accuracy, ROC-AUC, and PR-AUC were computed on the test set.
- Positive Class Weight Ratio: scale_pos_weight = (number of negative samples) / (number of positive samples) was applied to the gradient boosting models to offset class imbalance.

# **Table S6.** Full list of association between covariates with poor self-rated health, behavioral risk factor surveillance system, 2023.

| **Variable** | **Unadjusted** | | **Adjusted** |
| --- | --- | --- | --- |
| **Odds Ratio (95% Confidence Interval)** | | |
| **Sex** | | | |
| Male | 0.91 (0.913 – 0.915) | | 1.24 (1.236 – 1.238) |
| Female | 1 [Reference] | | |
| **Age (year)** | | | |
| 18-29 | 0.92 (0.914 – 0.917) | | 0.79 (0.788 – 0.791) |
| 30-39 | 1 [Reference] | | |
| 40-49 | 1.28 (1.280 – 1.283) | | 1.31 (1.305 – 1.310) |
| 50-59 | 1.68 (1.679 – 1.684) | | 1.56 (1.557 – 1.562) |
| 60-69 | 1.92 (1.921 – 1.926) | | 1.49 (1.488 – 1.493) |
| 70-79 | 2.05 (2.045 – 2.051) | | 1.46 (1.454 – 1.460) |
| >80 | 2.40 (2.398 – 2.408) | | 1.67 (1.665 – 1.673) |
| **Race/Ethnicity** | | | |
| White | 1 [Reference] | | |
| Black | 1.46 (1.461 – 1.465) | | 1.30 (1.296 – 1.300) |
| Asian | 0.66 (0.654 – 0.657) | | 1.34 (1.336 – 1.343) |
| American Indian/Alaskan Native | 1.80 (1.796 – 1.809) | | 1.33 (1.325 – 1.336) |
| Hispanic | 1.69 (1.684 – 1.687) | | 1.43 (1.427 – 1.431) |
| Other race | 1.31 (1.306 – 1.311) | | 1.23 (1.225 – 1.230) |
| **Education Level** | | | |
| Never attended school or only kindergarten | 4.58 (4.551 – 4.615) | | 3.31 (3.280 – 3.331) |
| Grades 1 - 8 (Elementary) | 3.09 (3.085 – 3.096) | | 2.26 (2.259 – 2.269) |
| Grades 9 - 11 (Some high school) | 2.08 (2.080 – 2.086) | | 1.48 (1.482 – 1.487) |
| Grade 12 or GED (High school graduate) | 1 [Reference] | | |
| College 1 year to 3 years | 0.79 (0.791 – 0.793) | | 0.86 (0.862 – 0.864) |
| College 4 years or more (College graduate) | 0.37 (0.370 – 0.371) | | 0.67 (0.672 – 0.674) |
| **Annual household income (USD)** | | | |
| <10,000 | 5.19 (5.177 – 5.199) | | 2.26 (2.251 – 2.263) |
| 10,000 to < 15,000 | 5.86 (5.848 – 5.875) | | 2.31 (2.300 – 2.313) |
| 15,000 to < 20,000 | 4.69 (4.684 – 4.703) | | 2.08 (2.072 – 2.082) |
| 20,000 to < 25,000 | 4.07 (4.063 – 4.079) | | 2.02 (2.014 – 2.022) |
| 25,000 to < 35,000 | 2.80 (2.794 – 2.803) | | 1.65 (1.650 – 1.656) |
| 35,000 to < 50,000 | 1.99 (1.986 – 1.992) | | 1.39 (1.387 – 1.392) |
| 50,000 to < 75,000 | 1.36 (1.359 – 1.364) | | 1.11 (1.107 – 1.111) |
| 75,000 to < 100,000 | 1 [Reference] | | |
| 100,000 to < 150,000 | 0.74 (0.743 – 0.746) | | 0.86 (0.854 – 0.858) |
| 150,000 to < 200,000 | 0.57 (0.568 – 0.571) | | 0.74 (0.741 – 0.745) |
| >200,000 | 0.43 (0.431 – 0.433) | | 0.65 (0.650 – 0.653) |
| **Employment Status** | | | |
| Yes (Employed for wages, Self-employed) | 1 [Reference] | | |
| No (Out of work, homemaker, student, retired, unable) | 2.77 (2.767 - 2.771) | | 1.50 (1.498 – 1.502) |
| **Marital Status** | | | |
| Married | 1 [Reference] | | |
| Divorced, Widowed, Separated | 2.10 (2.098 – 2.102) | | 0.98 (0.974 – 0.977) |
| Never Married, Member of an unmarried couple | 1.20 (1.200 – 1.202) | | 1.07 (1.073 – 1.076) |
| **Exercise** | | | |
| Yes | 1 [Reference] | | |
| No | 3.58 (3.573 – 3.580) | | 1.99 (1.990 – 1.994) |
| **Smoker** | | | |
| Yes | 2.11 (2.115 -2.120) | | 1.26 (1.259 – 1.263) |
| No | 1 [Reference] | | |
| **Heavy drinkers** | | | |
| Yes | 0.87 (0.872 – 0.875) | | 0.96 (0.961 – 0.965) |
| No | 1 [Reference] | | |
| **Body mass index** | | | |
| Normal weight | 1 [Reference] | | |
| Underweight | 2.20 (2.189 – 2.202) | 1.67 (1.662 – 1.674) | |
| Overweight | 1.25 (1.247 – 1.250) | 1.10 (1.101 – 1.104) | |
| Obese | 2.30 (2.296 – 2.301) | 1.70 (1.697 – 1.701) | |
| **Diabetes** | | | |
| Yes | 4.23 (4.225 – 4.234) | | 2.43 (2.431 – 2.437) |
| Pre-diabetes or borderline diabetes | 2.69 (2.685 – 2.696) | | 1.59 (1.590 – 1.597) |
| No | 1 [Reference] | | |
| **Heart attack** | | | |
| Yes | 4.44 (4.439 – 4.452) | | 2.08 (2.076 – 2.084) |
| No | 1 [Reference] | | |
| **Stroke** | | | |
| Yes | 4.45 (4.439 – 4.455) | | 1.96 (1.953 – 1.962) |
| No | 1 [Reference] | | |
| **Melanoma or any other types of cancer** | | | |
| Yes | 2.01 (2.010 – 2.015) | | 1.75 (1.744 – 1.749) |
| No | 1 [Reference] | | |
| **Number of days mental health not good (days)** | | | |
| 15–30 | 4.39 (4.389 – 4.397) | | 4.23 (4.227 – 4.239) |
| 8–14 | 1.93 (1.923 – 1.929) | | 2.33 (2.324 – 2.333) |
| 1–7 | 1.09 (1.092 – 1.094) | | 1.53 (1.532 – 1.536) |
| 0 | 1 [Reference] | | |
| **Depressive disorder** | | | |
| Yes | 2.69 (2.690 – 2.695) | | 1.56 (1.559 – 1.562) |
| No | 1 [Reference] | | |
| **Health insurance** | | | |
| Yes | 1 [Reference] | | |
| No | 1.58 (1.577 – 1.581) | | 1.19 (1.186 – 1.190) |
| **Personal health care provider** | | | |
| Yes | 1 [Reference] | | |
| No | 0.94 (0.944 – 0.946) | | 0.92 (0.922 – 0.925) |
| **How long since last routine checkup** |  | |  |
| Regular (<1 year) | 1 [Reference] | | |
| Irregular (>1 year or never) | 0.77 (0.769 – 0.771) | | 0.97 (0.971 – 0.974) |

# **Table S7.** TRIPOD-AI Checklist for “Behavioral and Sociodemographic Determinants of Poor Self-Rated Health in U.S. Adults.”

| **Section/Topic** | **Item** | **TRIPOD-AI Checklist Description** | **Where Addressed in Manuscript** |
| --- | --- | --- | --- |
| **Title and Abstract** | 1 | Identify the study as developing and/or validating an AI-based multivariable prediction model, and specify the target population and outcome. | Title and Abstract identify the study as developing interpretable ML-based models to predict poor SRH in U.S. adults using BRFSS 2023 data. |
| **Background and Objectives** | 2a | Explain the medical or public health context, rationale for developing or validating the model, and references to existing models. | Section 1. Introduction describes SRH as a validated health measure and reviews prior ML work with interpretability and fairness limitations. |
|  | 2b | Specify the study objectives and whether the model is for development, validation, or both. | Section 1. Final paragraph of Introduction clearly lists four study aims: identifying predictors, comparing ML models, interpreting results, and contextualizing findings within SDOH. |
| **Source of Data** | 3a | Describe the study design or source of data (e.g., randomized trial, cohort, registry) separately for development and validation datasets, if applicable. | Section 2.1. BRFSS 2023, a nationally representative cross-sectional survey of U.S. adults. |
|  | 3b | Specify key dates, including start and end of data collection. | BRFSS 2023 dataset specified; data collected throughout 2023 by CDC. |
| **Participants** | 4a | Describe study setting, locations, and eligibility criteria. | Section 2.1 and 2.2. Respondents aged ≥18 years from all U.S. states and territories; exclusions for missing or invalid SRH responses. |
|  | 4b | Indicate the number of participants and outcome events in each dataset. | Section 2.1 and 2.2. Analytic sample n = 302,125; 17% reported poor SRH. |
| **Outcome** | 5a | Define the outcome, how and when it was assessed. | Section 2.1 and 2.2. SRH assessed via standard CDC item, dichotomized as poor (fair/poor) vs. good (good/very good/excellent). |
|  | 5b | Report any pre-processing steps applied to the outcome (e.g., transformations, categorizations). | Section 2.2. |
| **Predictors** | 6a | Define all predictors and how they were measured. | Section 2.2 and Appendix A describe sociodemographic, behavioral, and clinical variables. |
|  | 6b | Report any pre-processing steps for predictors (e.g., encoding, normalization). | Section 2.2. Categorical variables one-hot encoded; continuous features standardized. |
| **Sample Size** | 7 | Explain how sample size was determined. | Based on all eligible BRFSS 2023 respondents with complete data; large sample ensures sufficient power for ML training. |
| **Missing Data** | 8 | Describe how missing data were handled (e.g., complete-case, imputation). | Section 2.2. Listwise deletion of missing or invalid responses. |
| **Model Development** | 9a | Specify how predictors were handled during model development. | Section 2.2 and 2.3. One-hot encoding applied for categorical variables; For oversampling, SMOTE-NC was applied. |
|  | 9b | Specify type of model, all model-building procedures, and method for selecting predictors. | Section 2.3. Logistic Regression, Random Forest, XGBoost, and LightGBM applied with all predictors included. |
|  | 9c | Describe how hyperparameters were tuned. | Section 2.3 and Supplementary table S4 (Appendix B). |
|  | 9d | Describe methods for handling data imbalance. | Section 2.3. SMOTENC oversampling and algorithmic class-weighting employed. |
|  | 9e | Specify software packages and versions used. | Section 2. Google Colab; Python 3.11; scikit-learn, XGBoost, LightGBM, SHAP, statsmodels libraries etc. |
| **Model Performance and Validation** | 10a | Specify all performance metrics used to evaluate the model. | Section 2.3. Sensitivity, specificity, ROC-AUC, PR-AUC, F1, and calibration metrics reported. |
|  | 10b | Describe internal and/or external validation methods. | Section 2.3. Internal validation through 80:20 train–test split and 5-fold cross-validation. |
|  | 10c | Report calibration assessment and methods used. | Section 2.3. Isotonic regression used for probability calibration; calibration results presented. |
|  | 10d | Report any uncertainty measures (e.g., confidence intervals). | Section 2.5. Logistic regression odds ratios with 95% CI reported. ML metrics reported as point estimates. |
| **Model Explainability and Fairness** | 11a | Describe explainability or interpretability methods. | Section 2.4 and 3.3. SHAP (Shapley Additive Explanations) used to quantify predictor contributions and directions. |
|  | 11b | Report subgroup analyses or fairness evaluations, if conducted. | Section 2.3.1 and 3.2. Subgroup analyses across age, income, education, and race/ethnicity performed. |
| **Results: Participants** | 12a | Report participant flow and numbers at each stage. | Section 3. Participant flow described; exclusions for missing SRH. |
|  | 12b | Provide summary characteristics of participants. | Section 2.1 and Table 1 reports descriptive statistics by SRH category. |
| **Results: Model Performance** | 13 | Report model performance metrics and calibration results. | Section 3.1. Model metrics summarized in Table 2 and Figure 1-3; calibration results presented. |
| **Discussion** | 14a | Discuss limitations of the study, including sources of bias. | Section 4.5. Limitations subsection acknowledges cross-sectional design, survey weighting constraints, and generalizability limits. |
|  | 14b | Discuss model performance and interpretability in context of prior evidence. | Section 4.2. Compares findings to previous ML-SRH studies and highlights interpretability advantages. |
| **Implications** | 15 | Discuss potential clinical or public health use and future work. | Section 4.4 Emphasizes policy relevance under Social Determinants of Health framework. |
| **Funding and Conflicts** | 16 | Report funding sources and potential conflicts of interest. | Declared at end of manuscript: no funding; no competing interests. |

This checklist is based on the official TRIPOD-AI (Transparent Reporting of a multivariable prediction model for Individual Prognosis or Diagnosis – Artificial Intelligence extension). Each item has been contextualized for this study.
